# Supplementary material for: In Vitro Anticancer Properties of Novel Bis-Triazoles
Source: MDPI journal article supplement (doi:10.3390/cimb45010014), 2022-12-29

# Supplementary Materials (Fig. S3) – Apoptosis

Flow cytometric analysis of cell death mechanism (Apoptosis/Necrosis) in human melanoma MDA-MB435 cells, treated with **MS47** and **MS49** of  $0.5 \times \text{GI}_{50}$ ,  $1 \times \text{GI}_{50}$  and  $2 \times \text{GI}_{50}$  concentrations compared to the untreated cells (control group) and stained with FITC-conjugated annexin V and propidium iodide (PI) for (A) 24 h (B) 48 h and (C) 72 h.

**A)****MS47 ( $0.5 \times \text{GI}_{50}$ )**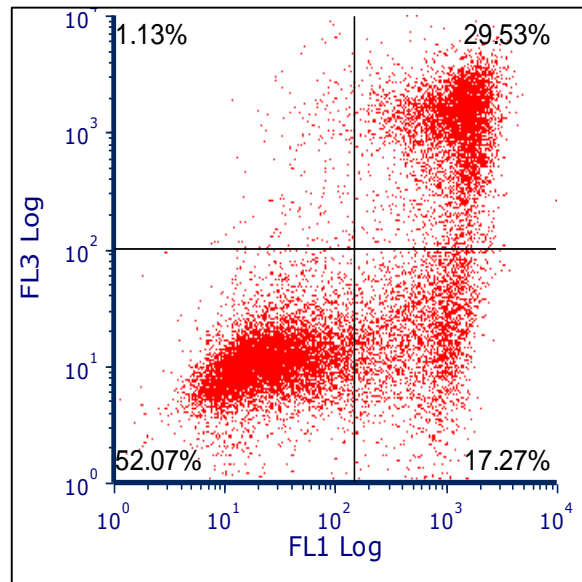**MS47 ( $1 \times \text{GI}_{50}$ )**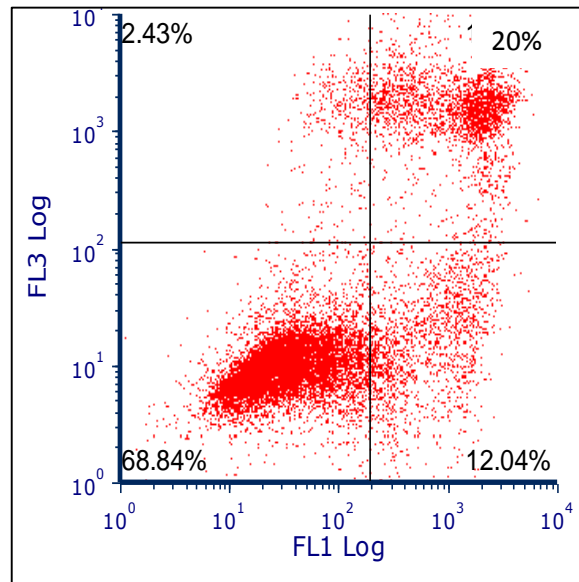**MS47 ( $2 \times \text{GI}_{50}$ )**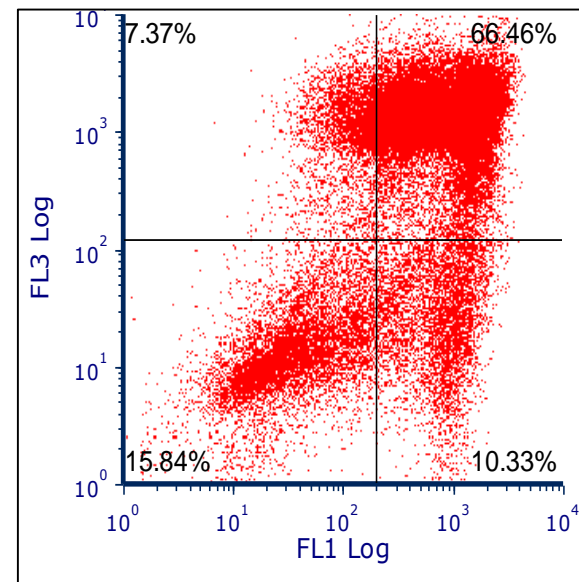**Control**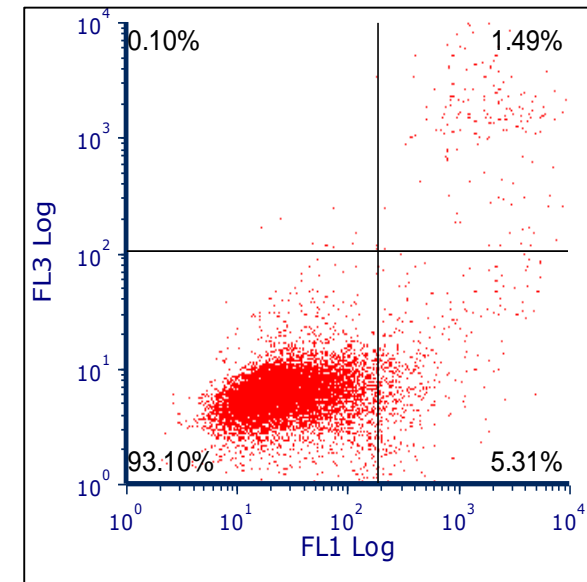**MS49 ( $0.5 \times \text{GI}_{50}$ )**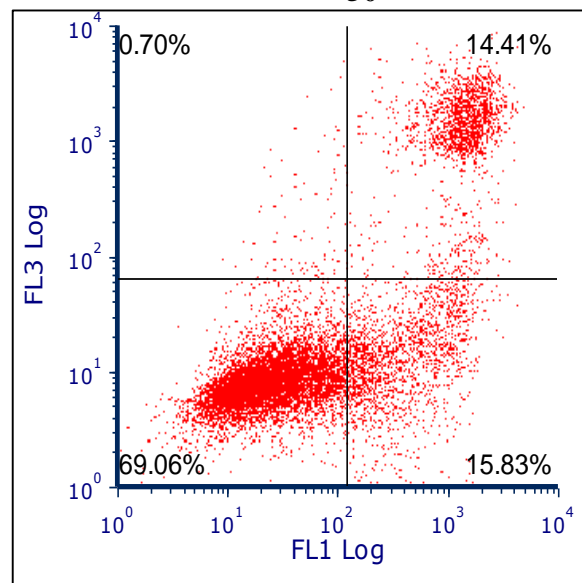**MS49 ( $1 \times \text{GI}_{50}$ )**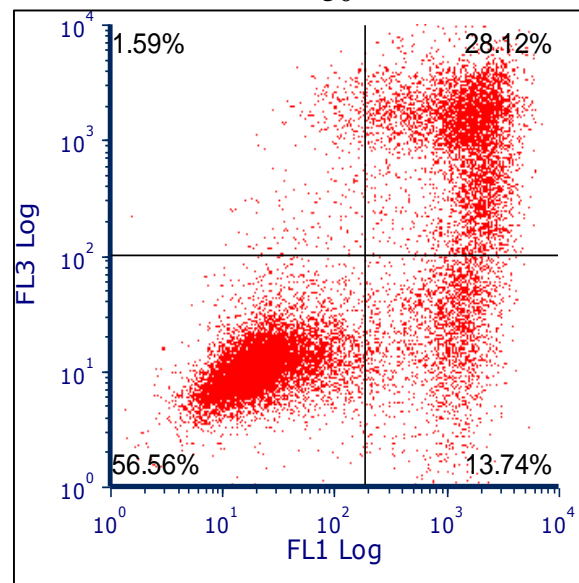**MS49 ( $2 \times \text{GI}_{50}$ )**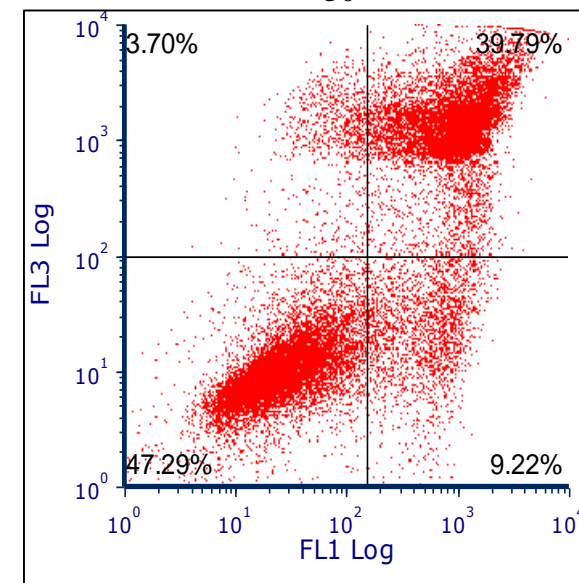

**B)****MS47 ( $0.5 \times \text{GI}_{50}$ )**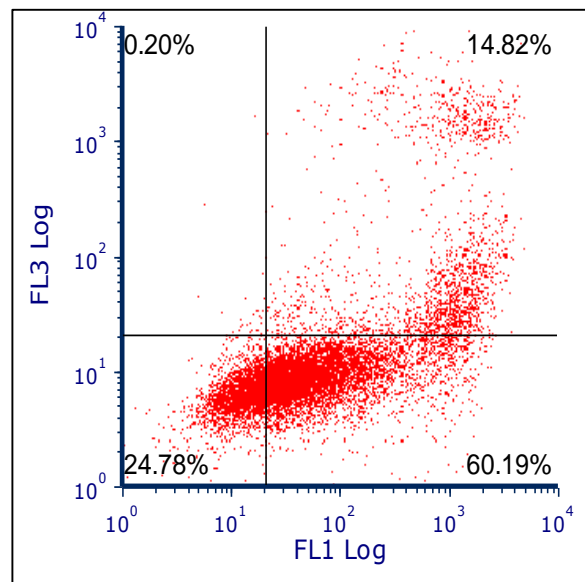**MS47 ( $1 \times \text{GI}_{50}$ )**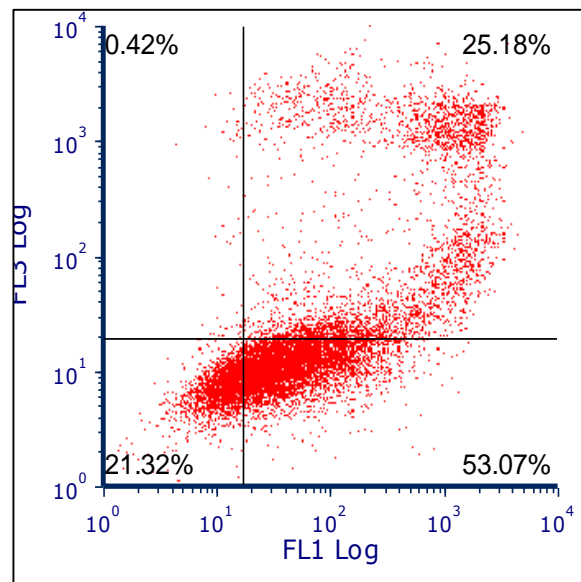**MS47 ( $2 \times \text{GI}_{50}$ )**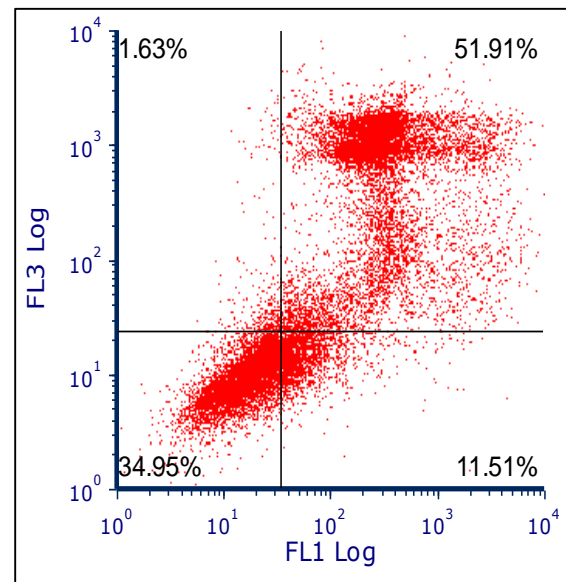**Control**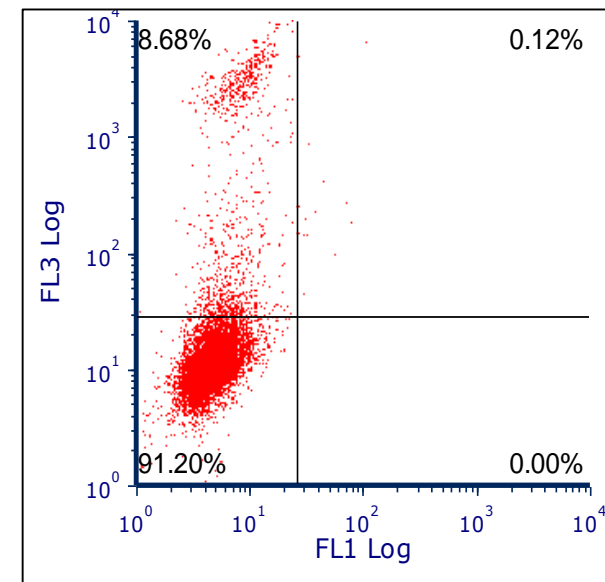**MS49 ( $0.5 \times \text{GI}_{50}$ )**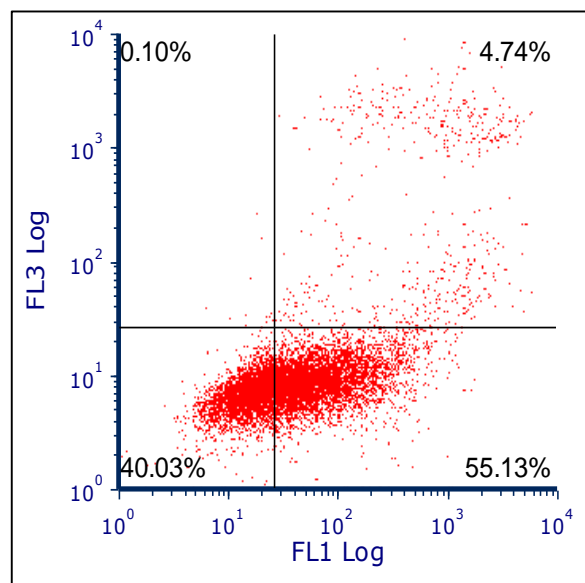**MS49 ( $1 \times \text{GI}_{50}$ )**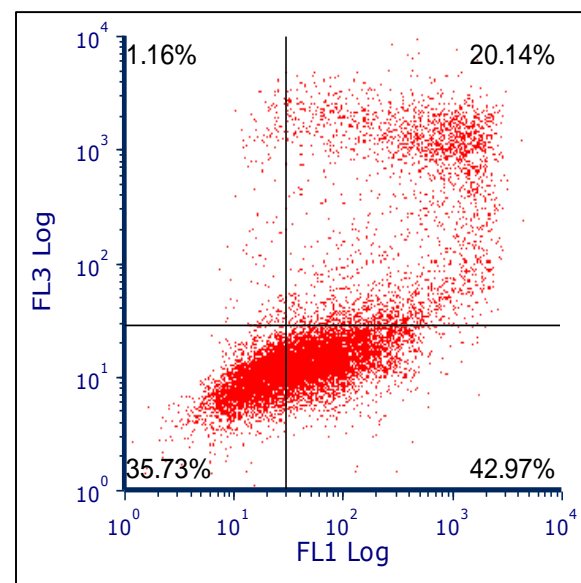**MS49 ( $2 \times \text{GI}_{50}$ )**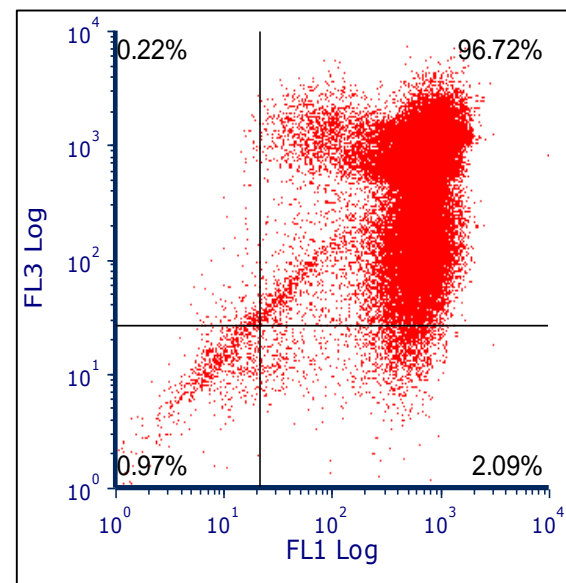

c)

**MS47 ( $0.5 \times GI_{50}$ )**

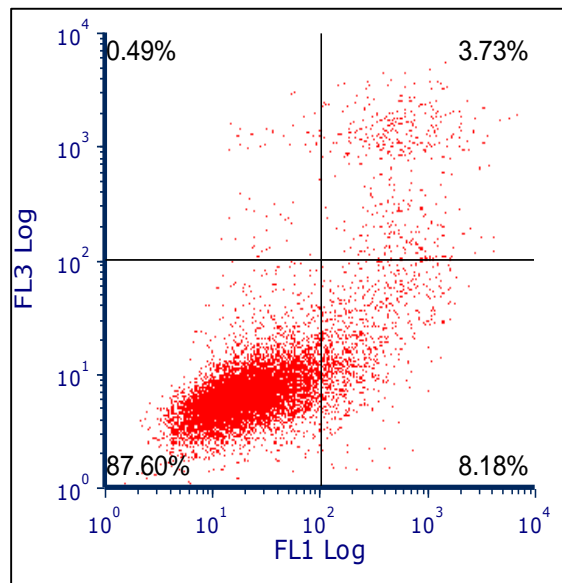

**MS47 ( $1 \times GI_{50}$ )**

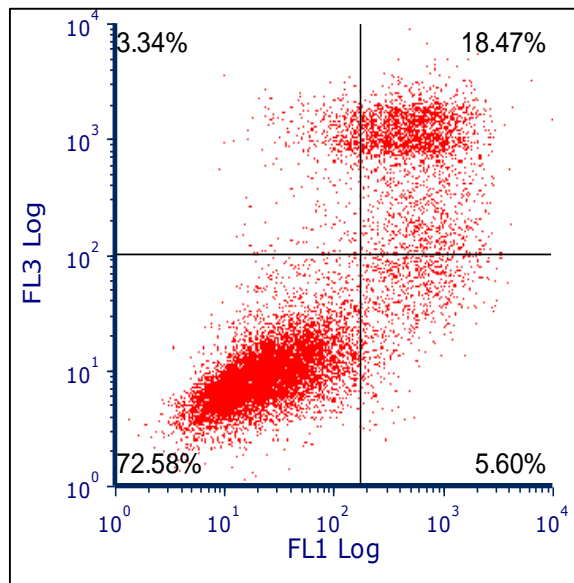

**MS47 ( $2 \times GI_{50}$ )**

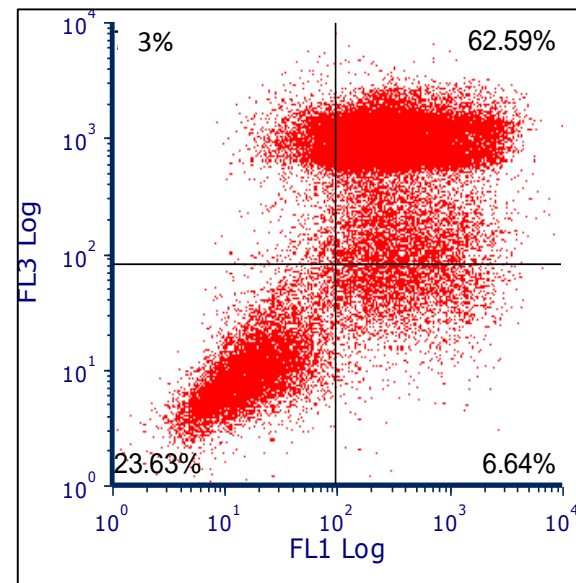

**Control**

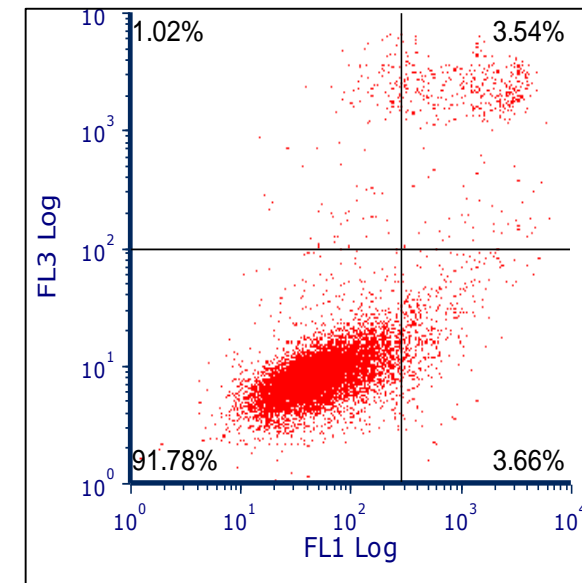

**MS49 ( $0.5 \times GI_{50}$ )**

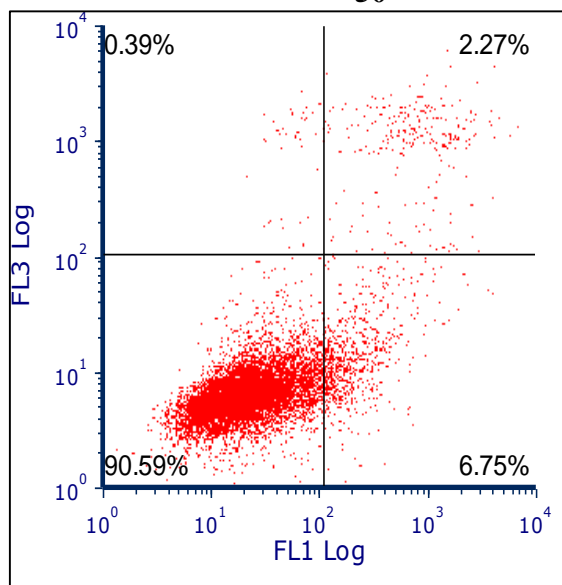

**MS49 ( $1 \times GI_{50}$ )**

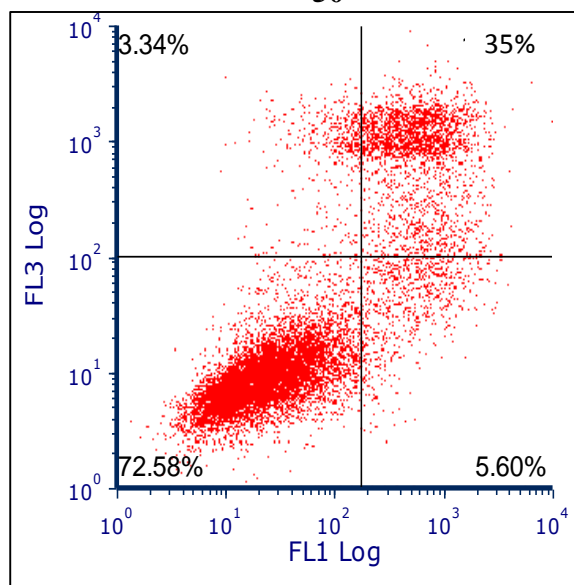

**MS49 ( $2 \times GI_{50}$ )**

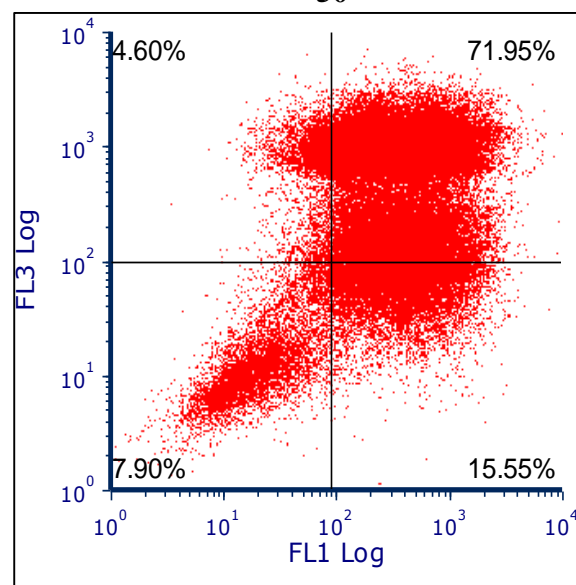

Supplement: s1 [file s1]
