# Supplementary material for: In Vitro Anticancer Properties of Novel Bis-Triazoles
Source: MDPI journal article supplement (doi:10.3390/cimb45010014), 2022-12-29
Supplement: s1 [file s1]

| National Cancer Institute Developmental Therapeutics Program |                        | NSC :778438/1              |                       | Units :Molar |                        | SSPL :0Z4Y              |  | EXP. ID :1405RS75 |  |
|--------------------------------------------------------------|------------------------|----------------------------|-----------------------|--------------|------------------------|-------------------------|--|-------------------|--|
| Mean Graphs                                                  |                        | Report Date :July 07, 2014 |                       |              |                        | Test Date :May 05, 2014 |  |                   |  |
| Panel/Cell Line                                              | Log <sub>10</sub> GI50 | GI50                       | Log <sub>10</sub> TGI | TGI          | Log <sub>10</sub> LC50 | LC50                    |  |                   |  |
| Leukemia                                                     |                        |                            |                       |              |                        |                         |  |                   |  |
| CCRF-CEM                                                     | -6.60                  |                            | > -4.00               |              | > -4.00                |                         |  |                   |  |
| HL-60(TB)                                                    | -6.65                  |                            | -6.19                 |              | > -4.00                |                         |  |                   |  |
| K-562                                                        | -6.22                  |                            | -4.84                 |              | > -4.00                |                         |  |                   |  |
| MOLT-4                                                       | -6.65                  |                            | -6.22                 |              | > -4.00                |                         |  |                   |  |
| RPMI-8226                                                    | -6.20                  |                            | -5.41                 |              | > -4.00                |                         |  |                   |  |
| SR                                                           | -6.34                  |                            | -5.27                 |              | > -4.00                |                         |  |                   |  |
| Non-Small Cell Lung Cancer                                   |                        |                            |                       |              |                        |                         |  |                   |  |
| A549/ATCC                                                    | -5.84                  |                            | -5.50                 |              | -5.15                  |                         |  |                   |  |
| EKVX                                                         | -5.81                  |                            | -5.52                 |              | -5.22                  |                         |  |                   |  |
| HOP-62                                                       | -5.81                  |                            | -5.54                 |              | -5.26                  |                         |  |                   |  |
| HOP-92                                                       | -6.37                  |                            | -5.86                 |              | -5.23                  |                         |  |                   |  |
| NCI-H226                                                     | -5.81                  |                            | -5.51                 |              | -5.20                  |                         |  |                   |  |
| NCI-H23                                                      | -6.57                  |                            | -6.10                 |              | -4.61                  |                         |  |                   |  |
| NCI-H322M                                                    | -6.54                  |                            | -5.98                 |              | -5.46                  |                         |  |                   |  |
| NCI-H460                                                     | -6.46                  |                            | -5.86                 |              | -5.20                  |                         |  |                   |  |
| NCI-H522                                                     | -6.71                  |                            | -6.32                 |              | -5.32                  |                         |  |                   |  |
| Colon Cancer                                                 |                        |                            |                       |              |                        |                         |  |                   |  |
| COLO 205                                                     | -6.76                  |                            | -6.48                 |              | -6.19                  |                         |  |                   |  |
| HCC-2998                                                     | -6.50                  |                            | -5.95                 |              | -5.35                  |                         |  |                   |  |
| HCT-116                                                      | -6.55                  |                            | -5.94                 |              | -5.45                  |                         |  |                   |  |
| HCT-15                                                       | -4.64                  |                            | > -4.00               |              | > -4.00                |                         |  |                   |  |
| HT29                                                         | -6.49                  |                            | -6.05                 |              | -4.47                  |                         |  |                   |  |
| KM12                                                         | -6.26                  |                            | -5.66                 |              | -5.19                  |                         |  |                   |  |
| SW-620                                                       | -6.39                  |                            | -5.76                 |              | -5.13                  |                         |  |                   |  |
| CNS Cancer                                                   |                        |                            |                       |              |                        |                         |  |                   |  |
| SF-268                                                       | -6.49                  |                            | -5.84                 |              | -5.16                  |                         |  |                   |  |
| SF-295                                                       | -5.87                  |                            | -5.57                 |              | -5.26                  |                         |  |                   |  |
| SF-539                                                       | -6.70                  |                            | -6.38                 |              | -6.06                  |                         |  |                   |  |
| SNB-19                                                       | -6.74                  |                            | -6.43                 |              | -6.12                  |                         |  |                   |  |
| SNB-75                                                       | -6.75                  |                            | -6.38                 |              | -5.99                  |                         |  |                   |  |
| U251                                                         | -6.76                  |                            | -6.46                 |              | -6.16                  |                         |  |                   |  |
| Melanoma                                                     |                        |                            |                       |              |                        |                         |  |                   |  |
| LOX IMVI                                                     | -6.73                  |                            | -6.31                 |              | -5.58                  |                         |  |                   |  |
| MALME-3M                                                     | -6.96                  |                            | -6.58                 |              | -6.20                  |                         |  |                   |  |
| M14                                                          | -5.80                  |                            | -5.47                 |              | -5.14                  |                         |  |                   |  |
| MDA-MB-435                                                   | -6.75                  |                            | -6.49                 |              | -6.22                  |                         |  |                   |  |
| SK-MEL-2                                                     | -6.66                  |                            | -6.26                 |              | -5.06                  |                         |  |                   |  |
| SK-MEL-28                                                    | -6.04                  |                            | -5.61                 |              | -5.20                  |                         |  |                   |  |
| SK-MEL-5                                                     | -6.64                  |                            | -6.15                 |              | -5.57                  |                         |  |                   |  |
| UACC-257                                                     | -6.15                  |                            | -5.62                 |              | -5.15                  |                         |  |                   |  |
| UACC-62                                                      | -5.98                  |                            | -5.59                 |              | -5.20                  |                         |  |                   |  |
| Ovarian Cancer                                               |                        |                            |                       |              |                        |                         |  |                   |  |
| IGROV1                                                       | -6.63                  |                            | -6.16                 |              | -5.42                  |                         |  |                   |  |
| OVCAR-3                                                      | -6.58                  |                            | -6.12                 |              | -5.13                  |                         |  |                   |  |
| OVCAR-4                                                      | -6.88                  |                            | -6.59                 |              | -6.29                  |                         |  |                   |  |
| OVCAR-5                                                      | -6.23                  |                            | -5.60                 |              | -5.04                  |                         |  |                   |  |
| OVCAR-8                                                      | -5.81                  |                            | -5.44                 |              |                        |                         |  |                   |  |
| NCI/ADR-RES                                                  | > -4.00                |                            | > -4.00               |              | > -4.00                |                         |  |                   |  |
| SK-OV-3                                                      | -5.70                  |                            | -5.27                 |              | -4.43                  |                         |  |                   |  |
| Renal Cancer                                                 |                        |                            |                       |              |                        |                         |  |                   |  |
| 786-0                                                        | -4.62                  |                            | > -4.00               |              | > -4.00                |                         |  |                   |  |
| A498                                                         | -5.79                  |                            | -5.22                 |              | -4.59                  |                         |  |                   |  |
| ACHN                                                         | -5.02                  |                            | -4.63                 |              | -4.26                  |                         |  |                   |  |
| CAKI-1                                                       | > -4.00                |                            | > -4.00               |              | > -4.00                |                         |  |                   |  |
| RXF 393                                                      | -5.44                  |                            | -4.82                 |              | -4.26                  |                         |  |                   |  |
| SN12C                                                        | -6.73                  |                            | -6.43                 |              | -6.13                  |                         |  |                   |  |
| TK-10                                                        | -4.95                  |                            | -4.52                 |              | -4.09                  |                         |  |                   |  |
| UO-31                                                        | -4.77                  |                            | -4.42                 |              | -4.07                  |                         |  |                   |  |
| Prostate Cancer                                              |                        |                            |                       |              |                        |                         |  |                   |  |
| PC-3                                                         | -5.62                  |                            | -5.12                 |              | > -4.00                |                         |  |                   |  |
| DU-145                                                       | -5.99                  |                            | -5.65                 |              | -5.32                  |                         |  |                   |  |
| Breast Cancer                                                |                        |                            |                       |              |                        |                         |  |                   |  |
| MCF7                                                         | -6.84                  |                            | -6.45                 |              | -6.05                  |                         |  |                   |  |
| MDA-MB-231/ATCC                                              | -6.60                  |                            | -4.99                 |              | -4.21                  |                         |  |                   |  |
| HS 578T                                                      | -5.54                  |                            | -5.04                 |              | > -4.00                |                         |  |                   |  |
| BT-549                                                       | -5.76                  |                            | -5.50                 |              | -5.24                  |                         |  |                   |  |
| MDA-MB-468                                                   | -6.76                  |                            | -6.42                 |              | -6.07                  |                         |  |                   |  |
|                                                              |                        |                            |                       |              |                        |                         |  |                   |  |
|                                                              |                        |                            |                       |              |                        |                         |  |                   |  |
|                                                              |                        |                            |                       |              |                        |                         |  |                   |  |
|                                                              |                        |                            |                       |              |                        |                         |  |                   |  |
|                                                              |                        |                            |                       |              |                        |                         |  |                   |  |
|                                                              |                        |                            |                       |              |                        |                         |  |                   |  |
|                                                              |                        |                            |                       |              |                        |                         |  |                   |  |
|                                                              |                        |                            |                       |              |                        |                         |  |                   |  |
|                                                              |                        |                            |                       |              |                        |                         |  |                   |  |
|                                                              |                        |                            |                       |              |                        |                         |  |                   |  |
|                                                              |                        |                            |                       |              |                        |                         |  |                   |  |
|                                                              |                        |                            |                       |              |                        |                         |  |                   |  |
|                                                              |                        |                            |                       |              |                        |                         |  |                   |  |
|                                                              |                        |                            |                       |              |                        |                         |  |                   |  |
|                                                              |                        |                            |                       |              |                        |                         |  |                   |  |
|                                                              |                        |                            |                       |              |                        |                         |  |                   |  |
|                                                              |                        |                            |                       |              |                        |                         |  |                   |  |
|                                                              |                        |                            |                       |              |                        |                         |  |                   |  |
|                                                              |                        |                            |                       |              |                        |                         |  |                   |  |
|                                                              |                        |                            |                       |              |                        |                         |  |                   |  |
|                                                              |                        |                            |                       |              |                        |                         |  |                   |  |
|                                                              |                        |                            |                       |              |                        |                         |  |                   |  |
|                                                              |                        |                            |                       |              |                        |                         |  |                   |  |
|                                                              |                        |                            |                       |              |                        |                         |  |                   |  |
|                                                              |                        |                            |                       |              |                        |                         |  |                   |  |
|                                                              |                        |                            |                       |              |                        |                         |  |                   |  |
|                                                              |                        |                            |                       |              |                        |                         |  |                   |  |
|                                                              |                        |                            |                       |              |                        |                         |  |                   |  |
|                                                              |                        |                            |                       |              |                        |                         |  |                   |  |
|                                                              |                        |                            |                       |              |                        |                         |  |                   |  |
|                                                              |                        |                            |                       |              |                        |                         |  |                   |  |
|                                                              |                        |                            |                       |              |                        |                         |  |                   |  |
|                                                              |                        |                            |                       |              |                        |                         |  |                   |  |
|                                                              |                        |                            |                       |              |                        |                         |  |                   |  |
|                                                              |                        |                            |                       |              |                        |                         |  |                   |  |
|                                                              |                        |                            |                       |              |                        |                         |  |                   |  |
|                                                              |                        |                            |                       |              |                        |                         |  |                   |  |
|                                                              |                        |                            |                       |              |                        |                         |  |                   |  |
|                                                              |                        |                            |                       |              |                        |                         |  |                   |  |
|                                                              |                        |                            |                       |              |                        |                         |  |                   |  |
|                                                              |                        |                            |                       |              |                        |                         |  |                   |  |
|                                                              |                        |                            |                       |              |                        |                         |  |                   |  |
|                                                              |                        |                            |                       |              |                        |                         |  |                   |  |
|                                                              |                        |                            |                       |              |                        |                         |  |                   |  |
|                                                              |                        |                            |                       |              |                        |                         |  |                   |  |
|                                                              |                        |                            |                       |              |                        |                         |  |                   |  |
|                                                              |                        |                            |                       |              |                        |                         |  |                   |  |
|                                                              |                        |                            |                       |              |                        |                         |  |                   |  |
|                                                              |                        |                            |                       |              |                        |                         |  |                   |  |
|                                                              |                        |                            |                       |              |                        |                         |  |                   |  |
|                                                              |                        |                            |                       |              |                        |                         |  |                   |  |
|                                                              |                        |                            |                       |              |                        |                         |  |                   |  |
|                                                              |                        |                            |                       |              |                        |                         |  |                   |  |
|                                                              |                        |                            |                       |              |                        |                         |  |                   |  |
|                                                              |                        |                            |                       |              |                        |                         |  |                   |  |
|                                                              |                        |                            |                       |              |                        |                         |  |                   |  |
|                                                              |                        |                            |                       |              |                        |                         |  |                   |  |
